# Supplementary material
Source: Springer Nature journal article supplement (https://www.springermedizin.de/resource/supplementary/12884_2012_672_MOESM1_ESM.pdf/9457890)
Supplement: MOESM1 [file 9457890]

First Antenatal Visit < 14 weeks gestation  
(N=448)

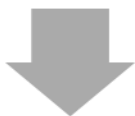

Met Inclusion Criteria:  
- Viable singleton pregnancy  
- Less than 14 weeks gestation

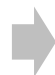

Excluded from study  
(N=82):

- Multiple pregnancies
- Has pre-existing autoimmune/renal disease
- Current pregnancy diagnosed with aneuploidy or

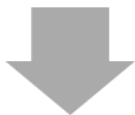

82.7%  
Eligibility Rate

Eligible Participants  
(N=366)

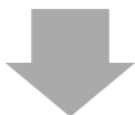

52.5%  
Participation Rate

Ongoing Study Participants  
(N=192)
